# Supplementary material for: The receptor BLT1 is essential on neutrophils in a mouse model of mucous membrane pemphigoid
Source: JCI journal article supplement (doi:10.1172/jci.insight.173914), 2025-09-22
Supplement: sd1 [file 1]

# Supplementary figure S1 - Gating Strategy

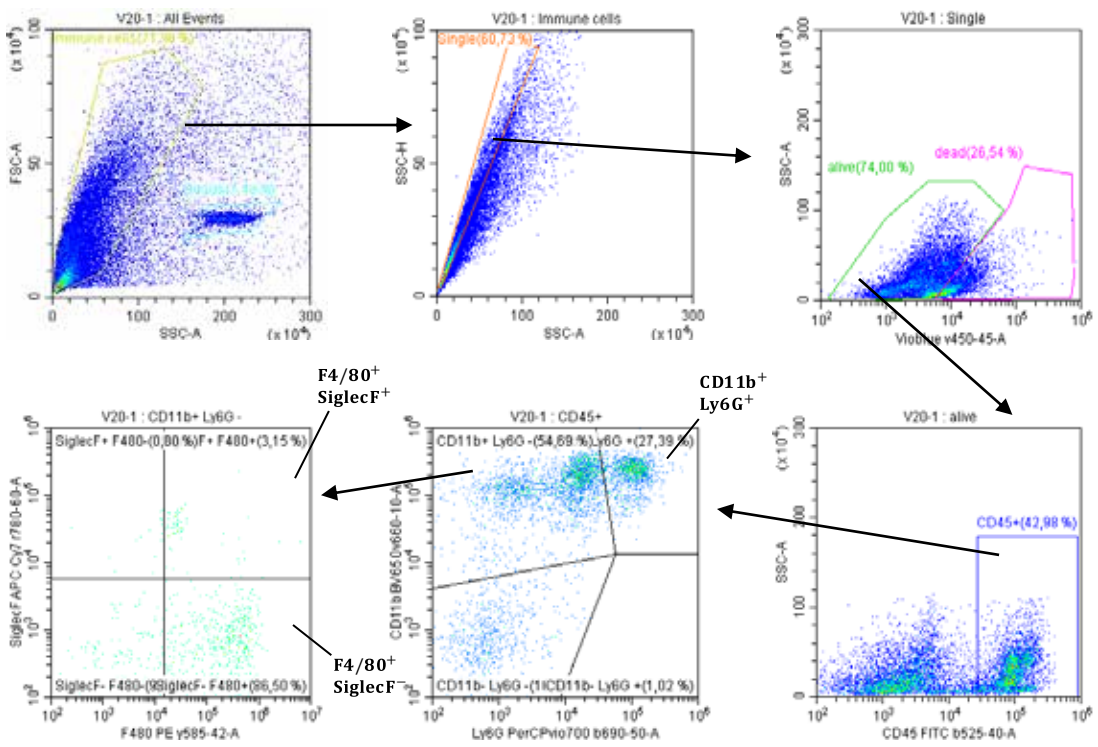

Supplementary figure S1. Gating strategy applied to distinguish select cell populations in skin lysates.

**Supplementary Table S1.**

| <b>Primer name</b> | <b>Target gene</b> | <b>Primer Sequence 5'-3'</b> |
|--------------------|--------------------|------------------------------|
| m.Bl1 - forward    | <i>Ltb4r1</i>      | AGGACCCTGGCACTAAGACA         |
| m.Bl1 - reverse    |                    | AGCCATCAAAAGGACAGGGT         |
| m.HPRT-forward     | <i>Hprt1</i>       | GGTTAAGCAGTACAGCCCCA         |
| m.HPRT- reverse    |                    | CAAATCCAACAAAGTCTGGCCT       |

**Supplementary table S2. Antibodies used to characterized dermal infiltrates by flow cytometry.**

| <b>Fluorochrome</b>  | <b>Specificity</b> | <b>Company</b>  |
|----------------------|--------------------|-----------------|
| FITC                 | CD45               | BD Biosciences  |
| Brilliant Violet 650 | CD11b              | BioLegend       |
| PerCP Vio700         | Ly-6G              | Miltenyi Biotec |
| PE                   | F4/80              | BioLegend       |
| APC/Cy7              | Siglec-F           | BioLegend       |
